# Supplementary material for: Applying Machine Learning with Localized Surface Plasmon Resonance Sensors to Detect SARS-CoV-2 Particles
Source: MDPI journal article supplement (doi:10.3390/bios12030173), 2022-03-13
Supplement: s1 [file s1]

## Supporting Information

**Figure.S1**

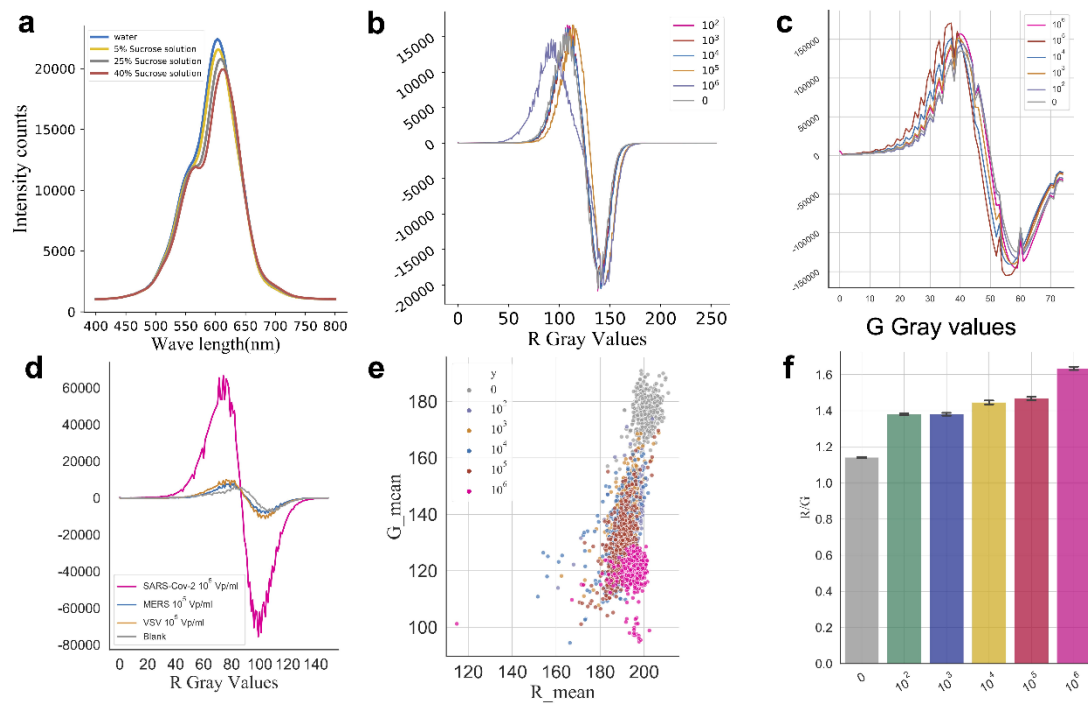

**Figure S1. Linear changes of image features in RGB format.** (a) extinction spectrum of the fabricated chip with water and different concentrations of sucrose solution. (b) The figure shows the difference between the 12 min image and the SP image in each gray frequency of the R channel in the chip without AuNPs-Ab added. (c) The figure shows the difference between the 12 min image and the SP image in each gray frequency of the G channel. (d) The figure shows the difference between the 12 min image and the SP image in each gray frequency of the R channel of different virus. (e) The scatterplot shows the distribution of G mean to R mean of all cropped difference images at different SARS-CoV-2 virus concentrations. (f) The histogram shows the ratio of G mean to R mean of all cropped difference images at different SARS-CoV-2 virus concentrations.

**Figure.S2**

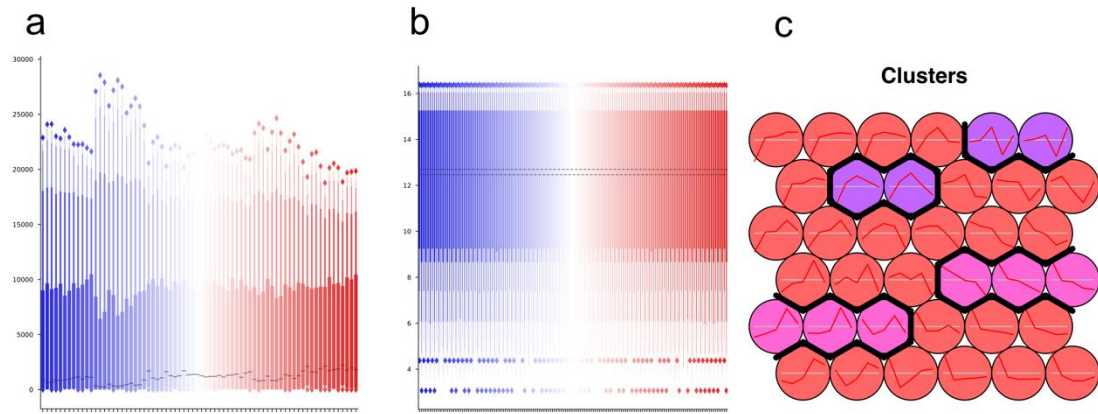

**Figure S2. The acquisition and standardization of multi-features of image in HSV format.** (a-b) Normalize data by the limma packages of RNA-seq technology, **a** refers to data without standardization, **b**, refers to data with standardization. (Each box stands for the H value distribution of an  $500 \times 500$  pixel image ( $n_{\text{box}}=72$ , blue box refers to SP images, red box refers to images at 12 min with SARS-CoV-2 concentration  $10^5$  vp/ml)) (c) The expression trend of each neuron H ratio in the samples (Neuron 1-36, from bottom to top, from left to right).

Figure.S3

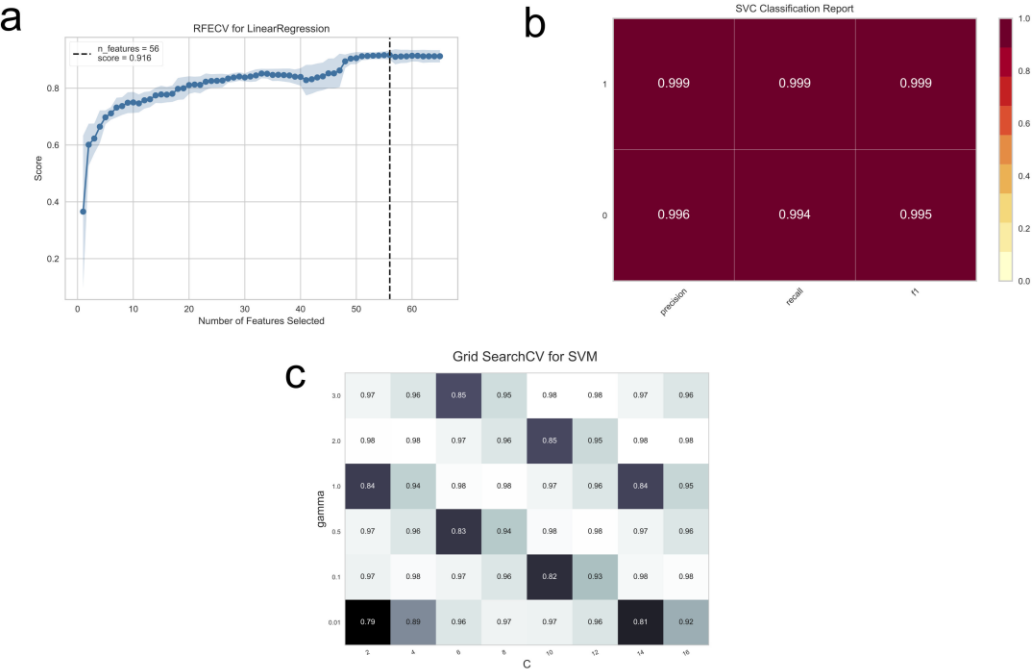

**Figure S3.** The training progress and result of SVM classifier. (a) The line shows the result of RFE CV for linear regression. (b) The heatmap shows the result of SVM classifier. (c) The heatmap of searching the best parameters of SVM classifier by Grid search and Cross-validation (C=16, gamma=2, cv=5)

| Table S1. Evaluation parameters of SVM Classifier models |                                                   |                   |
|----------------------------------------------------------|---------------------------------------------------|-------------------|
| parameters                                               | SVM Classifier Base on different Hue degree Ratio |                   |
|                                                          | positive                                          | Negative          |
| Precision(95% CI)                                        | 0.9986(0.997 , 1)                                 | 0.9968(0.991 , 1) |
| Recall (95% CI)                                          | 0.9984(0.997 , 1)                                 | 0.9946(0.989 , 1) |
| F1 (95% CI)                                              | 0.9990(0.998 , 1)                                 | 0.9948(0.989 , 1) |

| Table S2. Evaluation parameters of Regression models |                                    |                         |
|------------------------------------------------------|------------------------------------|-------------------------|
| parameters                                           | Base on different Hue degree Ratio |                         |
|                                                      | Linear Regression                  | SVM                     |
| MSE(95% CI)                                          | 0.0759(0.0713 , 0.0801)            | 0.0209(0.0193 , 0.0220) |
| MAE(95% CI)                                          | 0.0220(0.2138 , 0.2254)            | 0.1074(0.1089 , 0.1054) |
| R <sup>2</sup> (95% CI)                              | 0.9392(0.9353 , 0.9436)            | 0.9832(0.9819 , 0.9845) |
